# Supplementary material
Source: PubMed Central journal article supplement (PMC7926287)
Supplement: jama-e210987-s004.pdf [file jama-e210987-s004.pdf]

# Data Sharing Statement

Locatelli. Effect of Blinatumomab vs Chemotherapy on Event-Free Survival Among Children With High-risk First-Relapse B-Cell Acute Lymphoblastic Leukemia. *JAMA*. Published March 02, 2021. doi:10.1001/jama.2021.0987

## Data

**Data available:** Yes

**Data types:** Deidentified participant data, Data dictionary, Other (please specify)

**Additional Information:** Qualified researchers may request data from Amgen clinical studies. Complete details are available at <http://www.amgen.com/datasharing>.

**How to access data:** Qualified researchers may request data from Amgen clinical studies. Complete details are available at <http://www.amgen.com/datasharing>.

**When available:** With publication

## Supporting Documents

**Document types:** None

## Additional Information

**Who can access the data:** Qualified researchers may request data from Amgen clinical studies.

**Types of analyses:** Qualified researchers may request data from Amgen clinical studies. Complete details are available at <http://www.amgen.com/datasharing>.

**Mechanisms of data availability:** Qualified researchers may request data from Amgen clinical studies. Complete details are available at <http://www.amgen.com/datasharing>.

**Any additional restrictions:** Complete details are available at <http://www.amgen.com/datasharing>.
